# Supplementary material for: Studies on the enhanced properties of nanocrystalline Zn–Ni coatings from a new alkaline bath due to electrolyte additives
Source: Royal Society of Chemistry journal article supplement (doi:10.1039/c5ra09582d), 2015-01-01
Supplement: c5ra09582d1.pdf [file c5ra09582d1.pdf]

1 **Supporting Information**  
2 **For RSC Advances**  
3 **Studies on the enhanced properties of nanocrystalline**  
4 **Zn-Ni coatings from a new alkaline bath due to the**  
5 **additives**

6 Zhongbao Feng, Qingyang Li, Jinqiu Zhang, Peixia Yang, Maozhong An\*

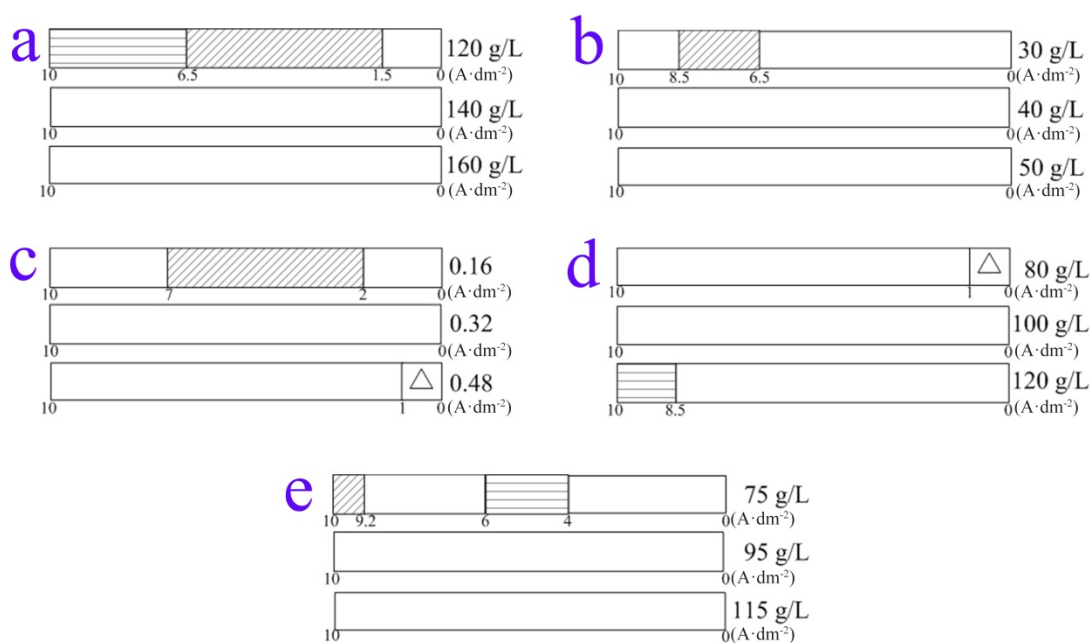

7  
8 Fig. S1 Effect of the bath composition on the brightness range of Zn-Ni alloy deposits:  
9 a) DMH content, b) Na<sub>4</sub>P<sub>2</sub>O<sub>7</sub>·10H<sub>2</sub>O content, c) Ni<sup>2+</sup>/(Zn<sup>2+</sup>+Ni<sup>2+</sup>) ratio, d) (Zn<sup>2+</sup>+Ni<sup>2+</sup>)  
10 content, e) K<sub>2</sub>CO<sub>3</sub> content, (  means that no Zn-Ni alloy coatings exists in the  
11 substrate surface,  means that the surface of Zn-Ni alloys is semi bright,   
12 means that the surface of Zn-Ni alloys is grey,  means that the surface of Zn-Ni  
13 alloys is mirror bright).

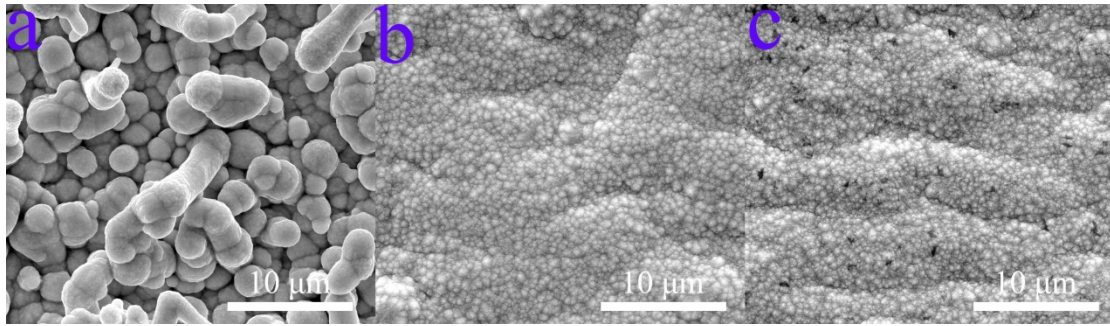

14

15 Fig. S2 Effect of DMH content on the surface morphologies of Zn-Ni alloy deposits: a)

16 120 g/L, b) 140 g/L, c) 160 g/L.

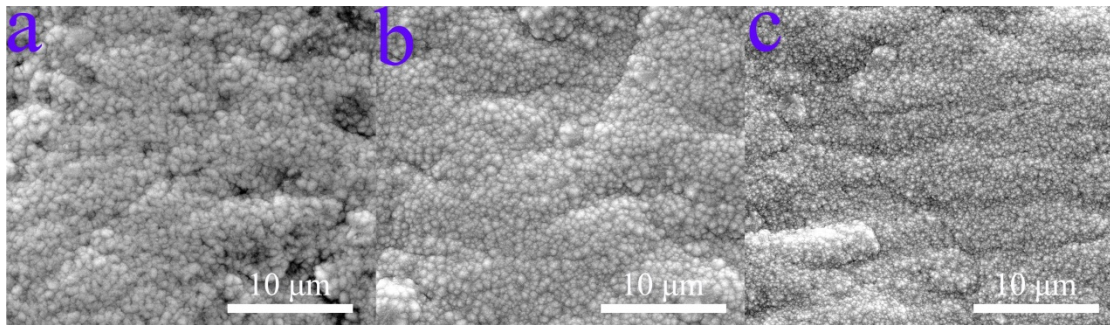

17

18 Fig. S3 Effect of  $\text{Na}_4\text{P}_2\text{O}_7 \cdot 10\text{H}_2\text{O}$  DMH content on the surface morphologies of Zn-

19 Ni alloy deposits: a) 30 g/L, b) 40 g/L, c) 50 g/L.

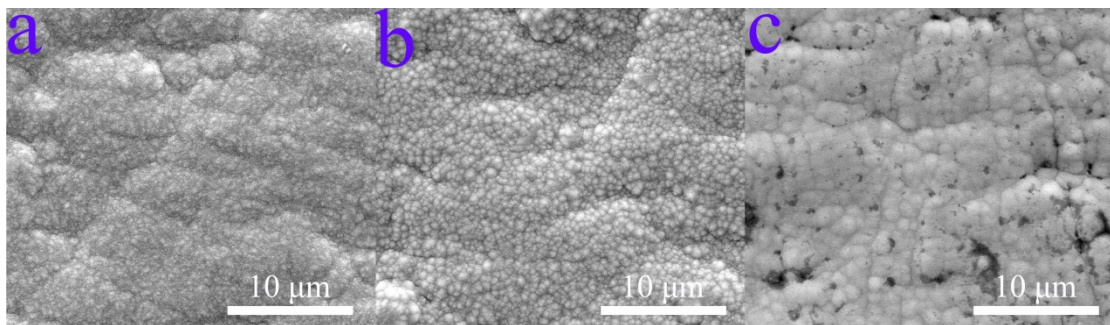

20

21 Fig. S4 Effect of  $\text{Ni}^{2+}/(\text{Zn}^{2+}+\text{Ni}^{2+})$  ratio on the surface morphologies of Zn-Ni alloy

22 deposits: a) 0.16, b) 0.32, c) 0.48.

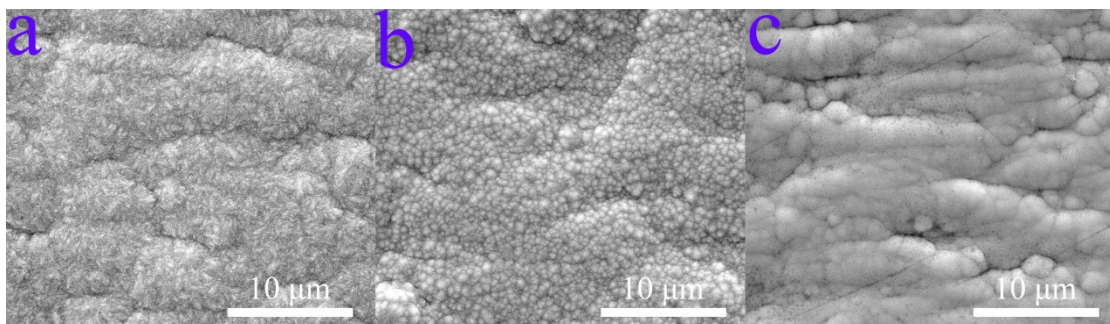

23

24 Fig. S5 Effect of ( $Zn^{2+}+Ni^{2+}$ ) content on the surface morphologies of Zn-Ni alloy  
25 deposits: a) 80 g/L, b) 100 g/L, c) 120 g/L.

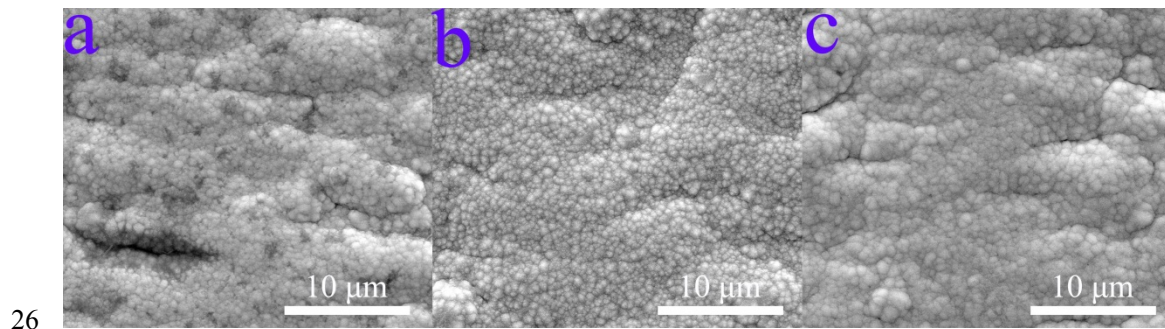

27 Fig. S6 Effect of  $K_2CO_3$  content on the surface morphologies of Zn-Ni alloy deposits:  
28 a) 75 g/L, b) 95 g/L, c) 115 g/L.

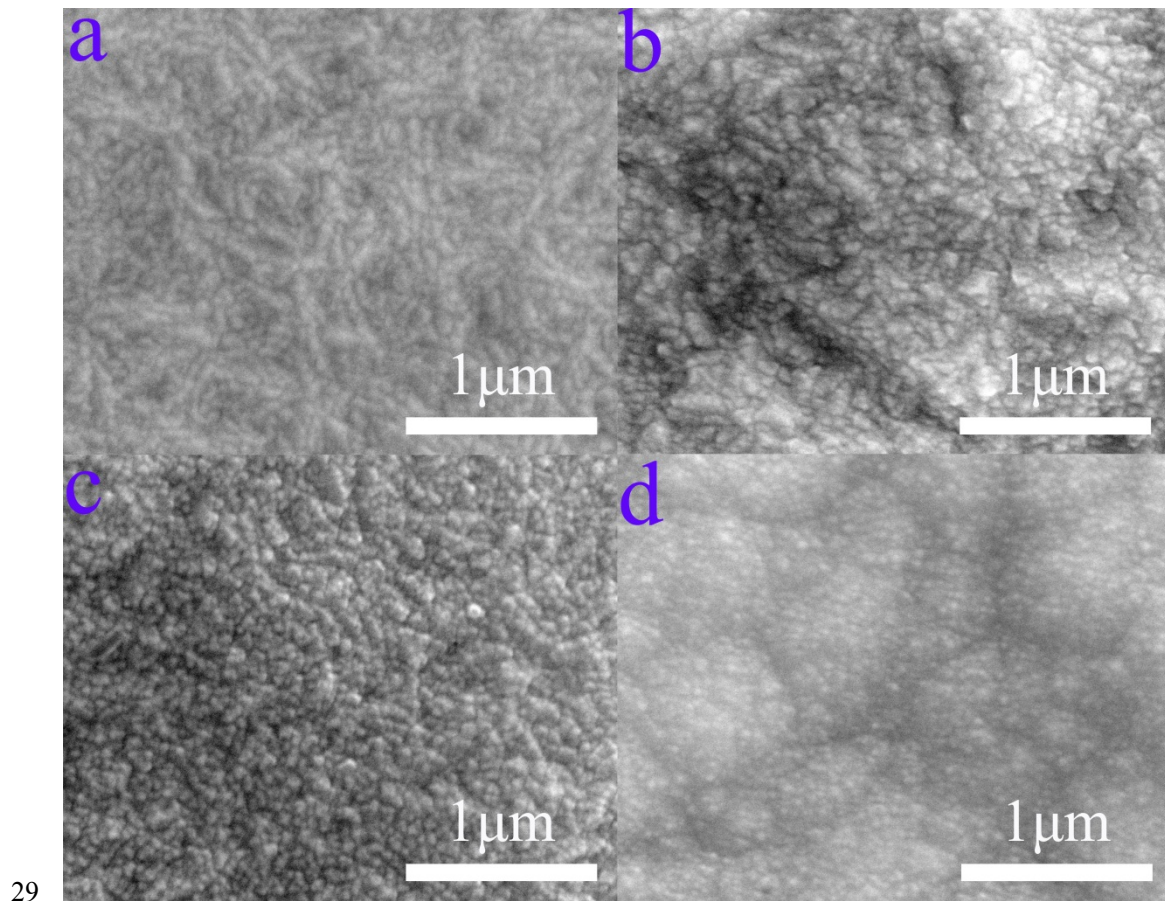

30 Fig. S7 SEM images of Zn-Ni alloys deposited from different baths: a) basic bath  
31 with 0 mg/L CA and 15 mg/L VL, b) basic bath with 10 mg/L CA and 15 mg/L VL, c)  
32 basic bath with 15 mg/L CA and 15 mg/L VL, d) basic bath with 20 mg/L CA and 15  
33 mg/L VL.

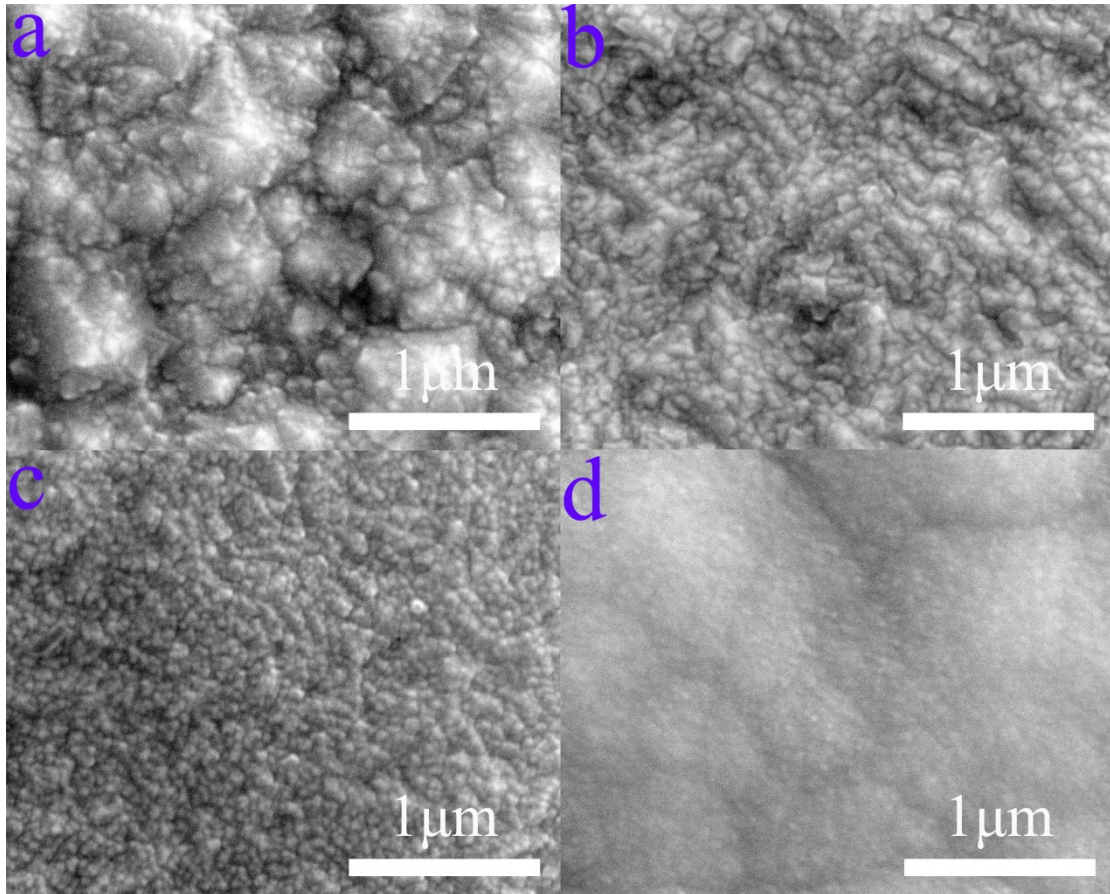

34

35 Fig. S8 SEM images of Zn-Ni alloys deposited from different baths: a) basic bath  
36 with 0 mg/L VL and 15 mg/L CA, b) basic bath with 10 mg/L VL and 15 mg/L CA, c)  
37 basic bath with 15 mg/L VL and 15 mg/L CA, d) basic bath with 20 mg/L VL and 15  
38 mg/L CA.

39

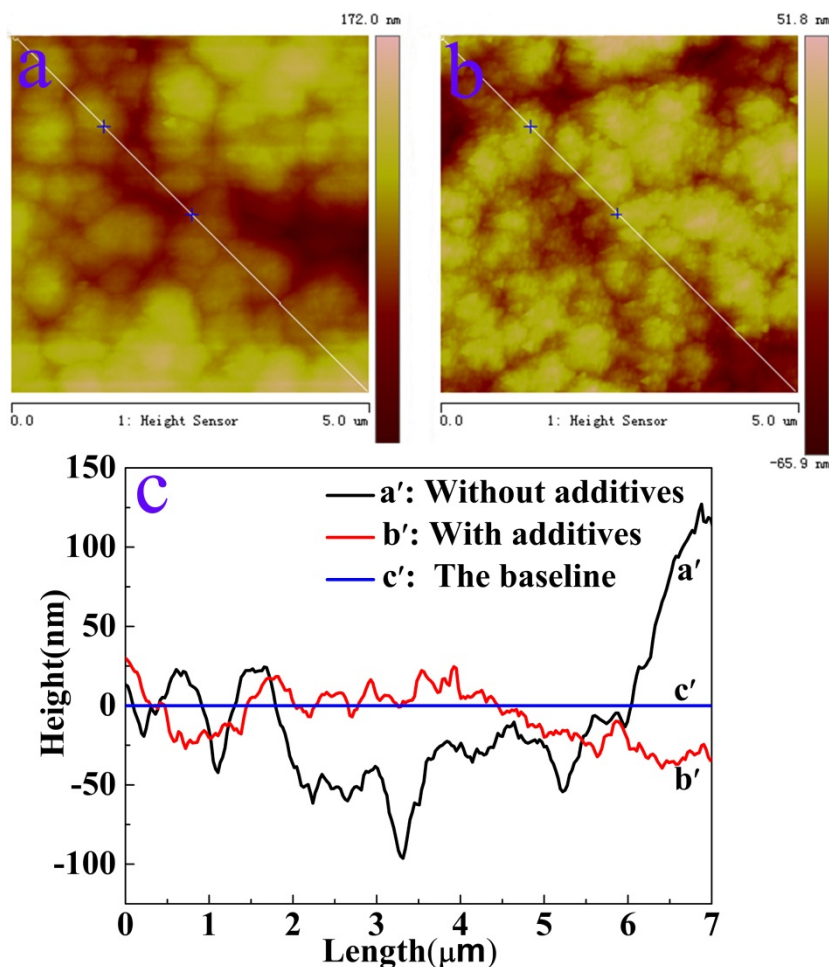

40

41 Fig. S9 a) AFM topographic images of Zn-Ni alloy deposits obtained from the baths  
 42 without additives, b) AFM topographic images of Zn-Ni alloy deposits obtained from  
 43 the baths with additives and c) section analysis of Zn-Ni alloys obtained from the  
 44 baths with and without additives.

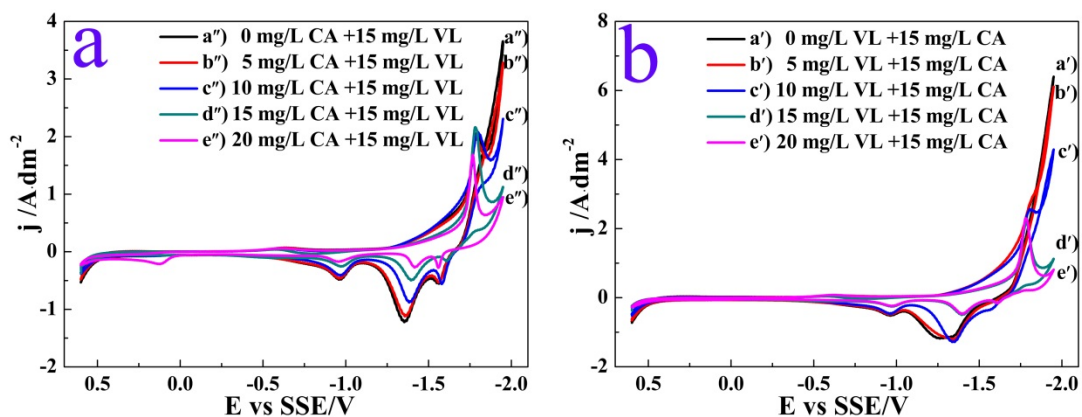

45

46 Fig. S10 CV curves of Zn-Ni alloys on Pt electrode obtained from the bath with: a)  
 47 different concentrations of CA and 15 mg/L VL, b) different concentrations of VL

48 and 15 mg/L CA.

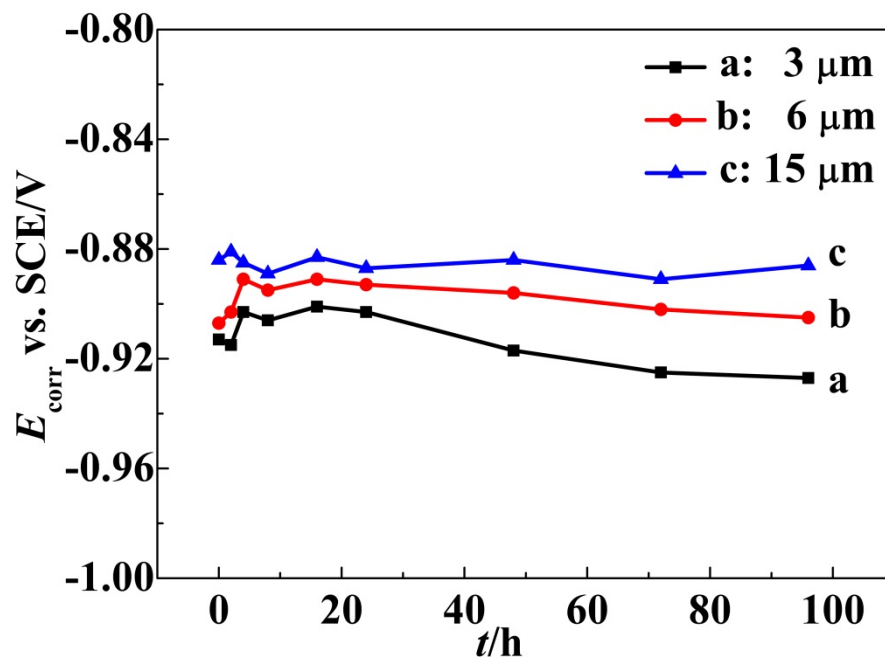

49

50 Fig. S11 The corrosion potential vs. time behaviors of steel substrate samples coated  
51 with different thickness of Zn-Ni alloy deposits immersed in 3.5% NaCl at 25 °C over  
52 96 h: a) 3 μm, b) 6 μm, c) 15 μm.
